# Supplementary material
Source: MDPI journal article supplement (https://www.mdpi.com/2072-4292/15/2/506)
Supplement: s1 [file s1]

# Added Value of Aerosol Observations of a Future AOS High Spectral Resolution Lidar with Respect to Classic Backscatter Spaceborne Lidar Measurements.

Cornut, F.; El Amraoui, L.; Cuesta, J.; Blanc, J. Added Value of Aerosol Observations of the Future AOS High Spectral Resolution Lidar with Respect to a Classic Backscatter Spaceborne Lidar Measurements. Preprints 2022, 2022120237 (doi: 10.20944/preprints202212.0237.v1).

## Supplementary Materials :

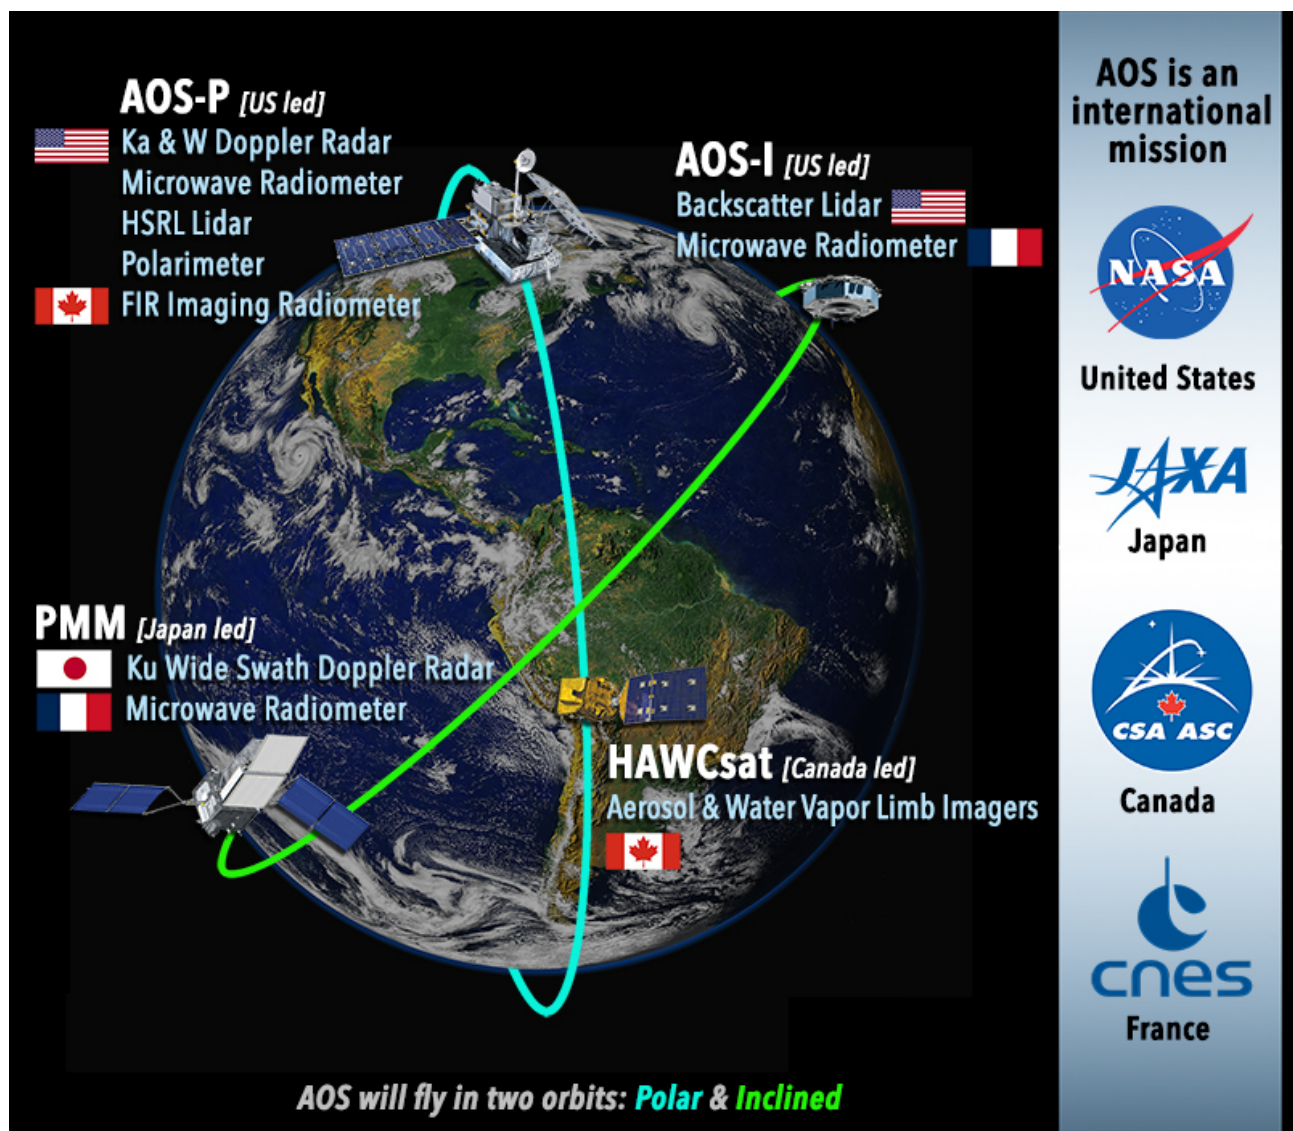

Figure S1 : AOS satellites orbiting Earth (Atmosphere Observing System Community Assessment Report, <https://aos.gsfc.nasa.gov/> , last check 11 January 2023).
